# Supplementary material for: Synthesis of dense MoS2 nanosheet layers on hollow carbon spheres and their applications in supercapacitors and the electrochemical hydrogen evolution reaction
Source: Royal Society of Chemistry journal article supplement (doi:10.1039/c8qi00562a), 2018-01-01
Supplement: c8qi00562a1.pdf [file c8qi00562a1.pdf]

# Synthesis of Dense MoS<sub>2</sub> Nanosheets Layer onto Hollow Carbon Sphere and Applications for Supercapacitor and Electrochemical Hydrogen Evolution Reaction

Weiwei Liu,<sup>a</sup> Menghua Zhu,<sup>a</sup> Jinghua Liu,<sup>a</sup> Wenjuan Hu,<sup>c</sup> Xin Li,<sup>a,b\*</sup>, Jian Liu<sup>c\*</sup>

<sup>a</sup> *Department of Chemistry and Chemical Engineering,*

<sup>b</sup> *State Key Lab of Urban Water Resource and Environment, Harbin Institute of Technology, Harbin 150090, China*

<sup>c</sup> *College of Materials Science and Technology, Qingdao University of Science and Technology, Qingdao, 266042, P.R. China*

*W.W. Liu and M.H. Zhu contributed equally to this work.*

*\*Corresponding authors: E-mail: [lixin@hit.edu.cn](mailto:lixin@hit.edu.cn); [liujian@qust.edu.cn](mailto:liujian@qust.edu.cn)*

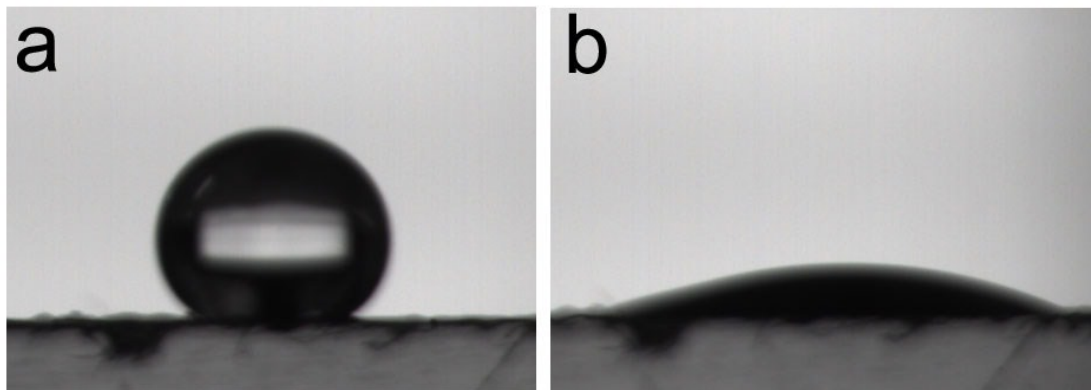

**Figure S1.** Contact angle test of HCS for (a) water and (b) DMF

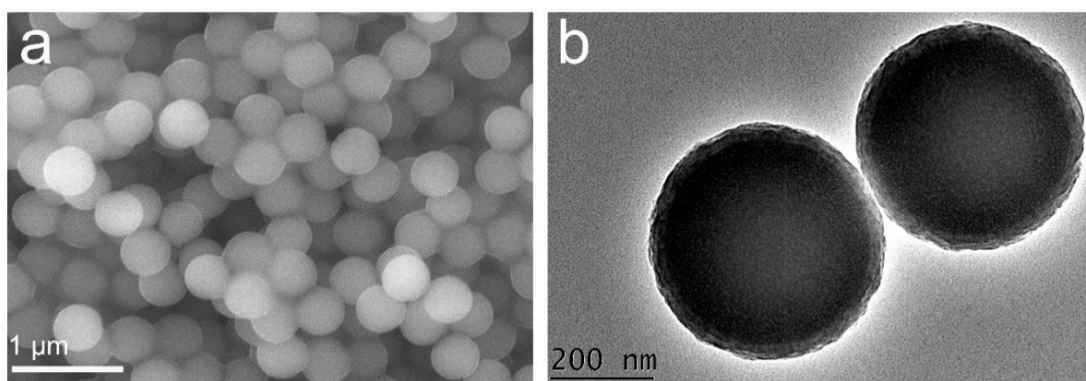

**Figure S2.** (a) FESEM and (b) TEM images of Polymer-SiO<sub>2</sub>.

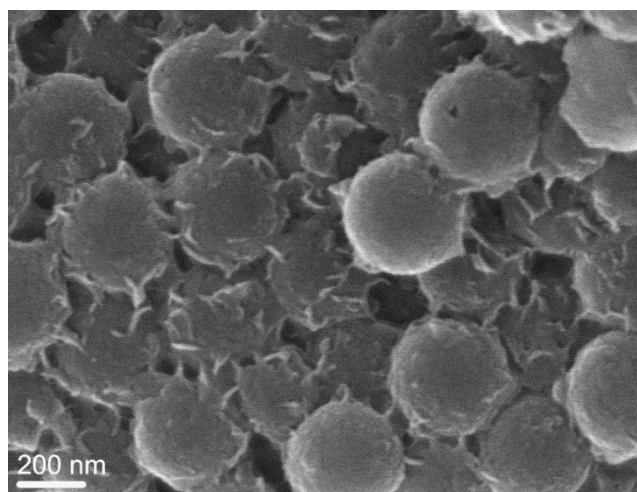

**Figure S3.** MoS<sub>2</sub>-HCS synthesized through hydrothermal process

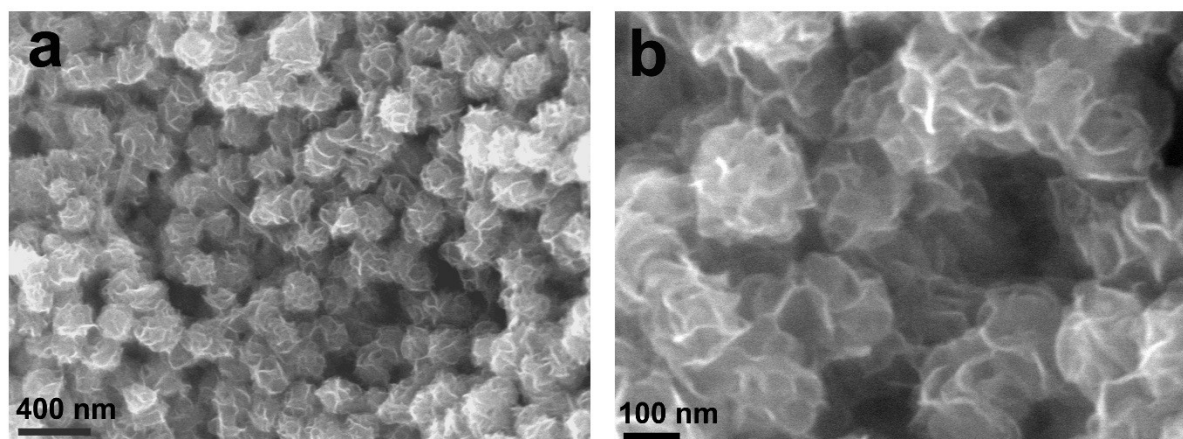

**Figure S4.** FESEM images of the MoS<sub>2</sub> nanosheets.

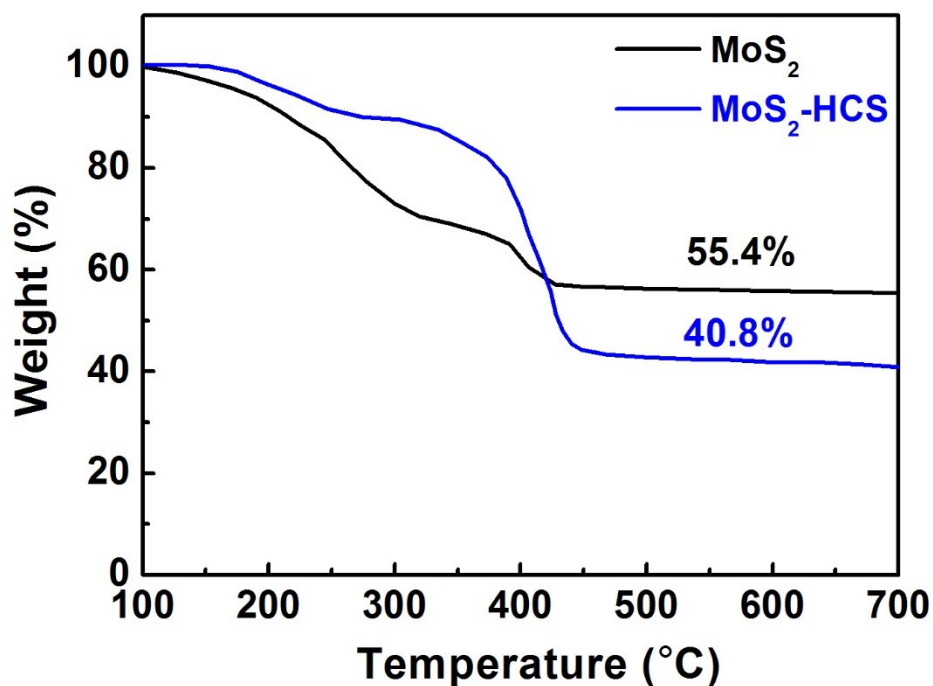

**Figure S5.** TGA curves of MoS<sub>2</sub>-HCS nanospheres and bare MoS<sub>2</sub> nanoparticles at heating rate of 10 °C min<sup>-1</sup> in air condition. The weight percentage of MoS<sub>2</sub> on the MoS<sub>2</sub>-HCS can be assumed to be  $X$ . Assuming the carbon content is completely removed after combustion, according to the equation:  $0.554 X = 0.408$ . So the  $X = 0.736$ . The weight loss of MoS<sub>2</sub>-HCS is caused by combustion of carbon and MoS<sub>2</sub>.

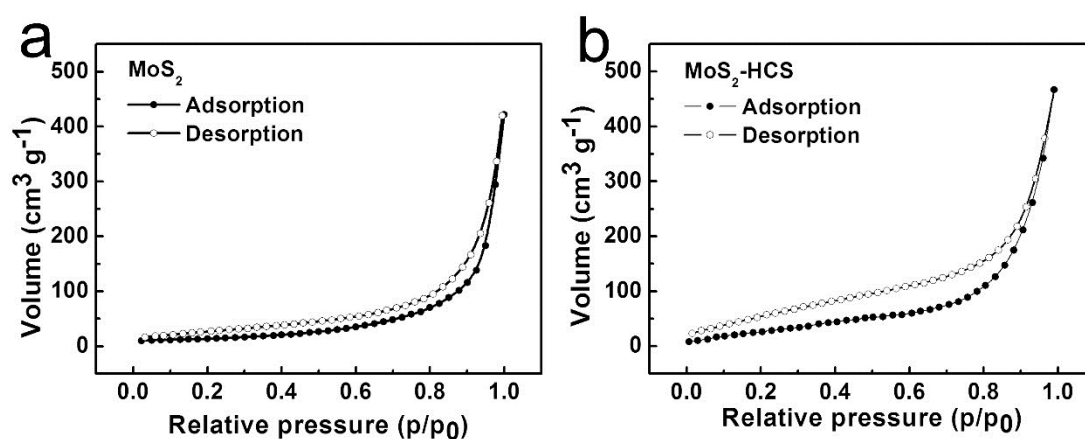

**Figure S6.** Nitrogen adsorption-desorption isotherms of (a) MoS<sub>2</sub> and (b) MoS<sub>2</sub>-HCS

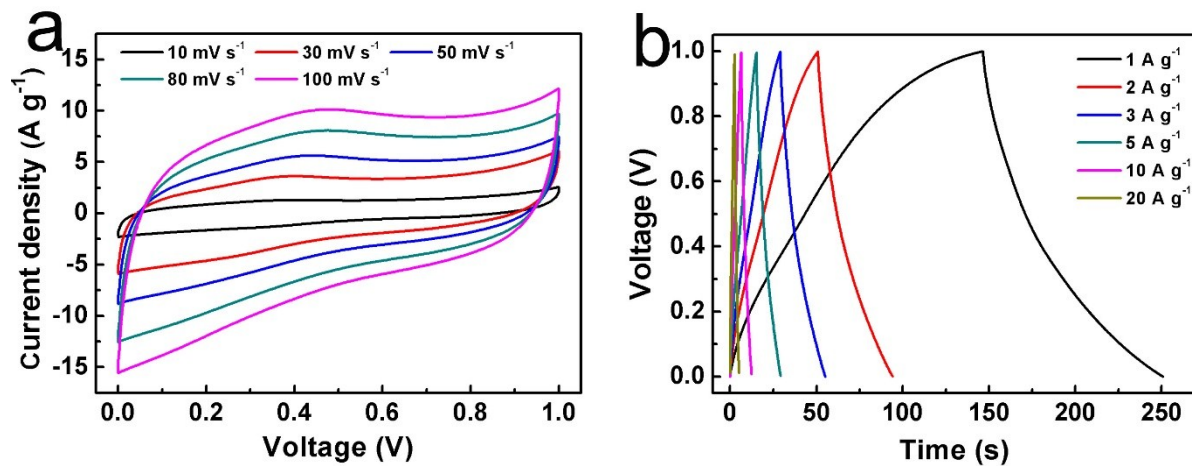

**Figure S7.** (a) CV and (b) GCD curves of the MoS<sub>2</sub> at different scan rates and current densities, respectively.

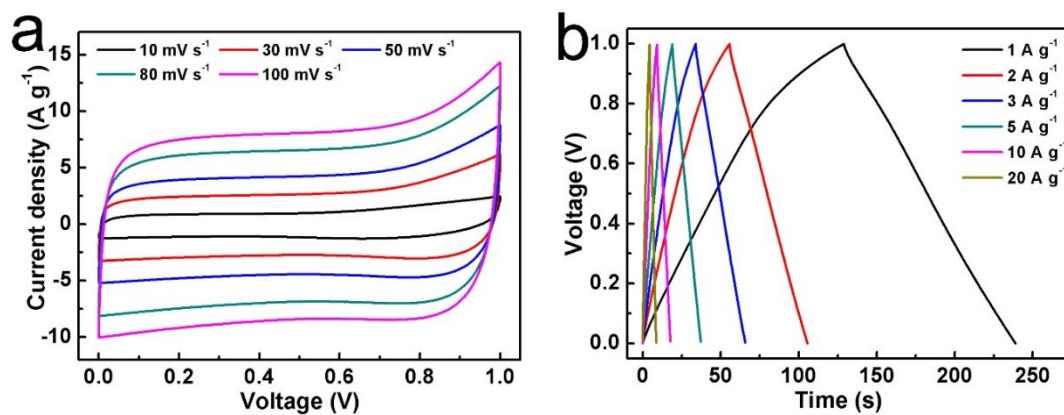

**Figure S8.** (a) CV and (b) GCD curves of HCS at different scan rates and current densities, respectively.

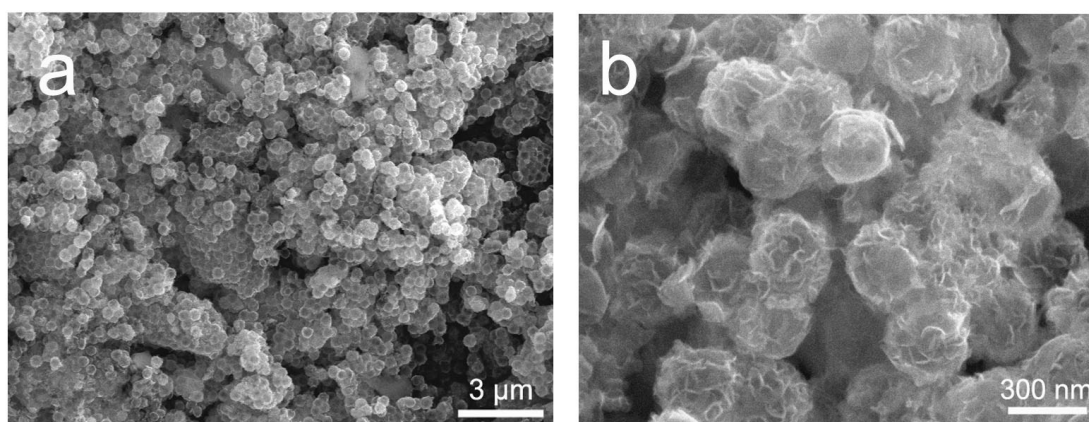

**Figure S9.** (a) SEM images of MoS<sub>2</sub>-HCS at low magnification and (b) high magnification after 1000 cycles of stability tests.
